# Supplementary material for: The transcription factors IRF8 and PU.1 negatively regulate plasma cell differentiation
Source: PubMed Central journal article supplement — J Exp Med. 2014 Oct 20;211(11):2169–81. doi: 10.1084/jem.20140425 (PMC4203955; doi:10.1084/jem.20140425), 2014-10-20
Supplement: supp_jem.20140425_JEM_20140425_sm.pdf [file supp_jem.20140425_JEM_20140425_sm.pdf]

## SUPPLEMENTAL MATERIAL

Carotta et al., <http://www.jem.org/cgi/content/full/jem.20140425/DC1>**Table S1.** Cellularity of splenic B cell populations

| Mice                               | Total B cells ( $\times 10^7$ ) | Follicular B cells ( $\times 10^7$ ) | MZ B cells ( $\times 10^6$ ) | Plasmablasts ( $\times 10^5$ ) | Plasma cells ( $\times 10^5$ ) |
|------------------------------------|---------------------------------|--------------------------------------|------------------------------|--------------------------------|--------------------------------|
| +/+                                | 4.1 $\pm$ 0.5                   | 3.0 $\pm$ 0.3                        | 7.5 $\pm$ 0.8                | 2.1 $\pm$ 0.5                  | 1.3 $\pm$ 0.2                  |
| PU.1cKO                            | 3.1 $\pm$ 0.3                   | 2.0 $\pm$ 0.2                        | 5.8 $\pm$ 0.3                | 1.4 $\pm$ 0.2                  | 1.1 $\pm$ 0.1                  |
| <i>Irf8</i> <sup>-/-</sup>         | 5.0 $\pm$ 0.6                   | 3.0 $\pm$ 0.5                        | 9.4 $\pm$ 1.0                | 2.5 $\pm$ 0.3                  | 2.9 $\pm$ 0.5**                |
| <i>Irf8</i> <sup>-/-</sup> PU.1cKO | 3.4 $\pm$ 0.2                   | 1.5 $\pm$ 0.1*                       | 9.2 $\pm$ 0.9                | 5.3 $\pm$ 0.5***               | 2.2 $\pm$ 0.2***               |
| <b>Double cKO</b>                  |                                 |                                      |                              |                                |                                |
| Cre <sup>-</sup> control           | 3.6 $\pm$ 0.7                   | 2.4 $\pm$ 0.4                        | 2.1 $\pm$ 0.4                | 0.6 $\pm$ 0.1                  | 0.9 $\pm$ 0.1                  |
| IRF8/PU.1cKO                       | 2.8 $\pm$ 0.3                   | 1.9 $\pm$ 0.2                        | 2.4 $\pm$ 0.6                | 1.0 $\pm$ 0.4                  | 0.6 $\pm$ 0.2                  |

Quantitation of the total B cell numbers (B220<sup>+</sup>CD19<sup>+</sup>), follicular B cells (B220<sup>+</sup>IgM<sup>low</sup>CD23<sup>+</sup>CD21<sup>-</sup>), marginal zone B cells (B220<sup>+</sup>IgM<sup>+</sup>CD21<sup>+</sup>CD23<sup>-</sup>), CD138<sup>+</sup>BLIMP-1/GFP<sup>low</sup> plasmablasts, and CD138<sup>+</sup>BLIMP-1/GFP<sup>high</sup> plasma cells in the spleen of mice of the indicated genotypes. All strains also carried the BLIMP-1/GFP reporter allele (*Prdm13<sup>flp/+</sup>*). While CD23 expression was reduced in the absence of PU.1, its expression was sufficient to allow the identification of the splenic B cell subsets. +/+, *n* = 6-10; PU.1cKO (*Spi1<sup>fl</sup>/Cd19cre<sup>+</sup>*), *n* = 3-5; *Irf8*<sup>-/-</sup>, *n* = 6-11; *Irf8*<sup>-/-</sup>PU.1cKO (*Irf8*<sup>-/-</sup>*Spi1<sup>fl</sup>/Cd19cre<sup>+</sup>*), *n* = 7-12; Cre<sup>-</sup> control (*Irf8<sup>fl/fl</sup>Spi1<sup>fl</sup>*), *n* = 5; IRF8/PU.1cKO (*Irf8<sup>fl/fl</sup>Spi1<sup>fl</sup>/Cd19cre<sup>+</sup>*), *n* = 5. Note that for PU.1cKO, *Irf8*<sup>-/-</sup>, and *Irf8*<sup>-/-</sup>PU.1cKO samples, p-values are compared with +/+ (WT) genotype. \*, *P* < 0.05; \*\*, *P* < 0.01; \*\*\*, *P* < 0.005. No significant differences were observed between the Cre<sup>-</sup> control and IRF8/PU.1cKO experimental genotypes.

**Table S2.** List of differentially expressed genes during B cell activation

| Gene name                    | Accession number | WT resting   | WT activated | <i>Irf8</i> <sup>-/-</sup> PU.1cKO resting | <i>Irf8</i> <sup>-/-</sup> PU.1cKO activated |
|------------------------------|------------------|--------------|--------------|--------------------------------------------|----------------------------------------------|
| <b>Receptors and ligands</b> |                  |              |              |                                            |                                              |
| Cd93                         | NM_010740        | 1.259707398  | 0.795268362  | 4.637269009                                | 3.205114922                                  |
| Slamf7                       | NM_144539        | 0.598381596  | 4.12944978   | 2.939016275                                | 3.950778747                                  |
| Emb                          | NM_010330        | -1.789422095 | -0.362286564 | 0.400213495                                | 2.086673454                                  |
| Cd44                         | NM_009851        | -1.259984499 | 2.629519278  | 0.204452809                                | 1.521354779                                  |
| Cd96                         | NM_032465        | -6.11847247  | 0.419348986  | -4.246774795                               | -0.186202288                                 |
| Thy1                         | NM_009382        | -5.11712077  | 4.040087017  | -2.845768871                               | 5.702438599                                  |
| Cxcr7                        | NM_007722        | 1.600983653  | -0.165149338 | 4.235008345                                | 2.804256407                                  |
| Cd74                         | NM_001042605     | 12.89784053  | 11.22919252  | 10.49775728                                | 10.5124966                                   |
| Fcer2a                       | NM_013517        | 9.584434217  | 8.443089282  | 6.215436937                                | 7.535802918                                  |
| H2-Aa                        | NM_010378        | 9.445776565  | 8.088121149  | 7.385963109                                | 7.520062651                                  |
| CD83                         | NM_009856        | 6.133647535  | 8.08663373   | 3.638218587                                | 7.297267847                                  |
| Il21r                        | NM_021887        | 5.583468192  | 4.710625837  | 3.084167494                                | 4.027923695                                  |
| Il6ra                        | NM_010559        | 3.780972889  | 2.198529693  | -0.345316746                               | 1.08782722                                   |
| Cd68                         | NM_001291058.1   | 1.954141875  | 1.712217186  | -0.108741605                               | 1.191589961                                  |
| Tnfrsf22                     | NM_023680        | 2.111944126  | 1.801293462  | -0.653933359                               | 0.816455751                                  |
| Ccl22                        | NM_009137        | 0.366571765  | 6.144398545  | -1.820611061                               | 6.837005668                                  |
| Ccl4                         | NM_013652        | -3.128845856 | 1.079015685  | -30.08448567                               | -0.554496746                                 |
| Ceacam1                      | NM_001039185     | 1.705601355  | -1.636935349 | 1.50094168                                 | -0.869046284                                 |
| C1cf1                        | NM_019952        | 6.418225736  | 4.453179831  | 5.37220023                                 | 4.518878112                                  |
| Cxcl16                       | NM_023158        | -1.070319498 | -3.445563718 | -1.842110709                               | -3.39826873                                  |
| Il10                         | NM_010548        | -1.530346034 | -5.029849055 | -1.927451805                               | -0.455095958                                 |
| Il12a                        | NM_008351        | 3.415678145  | -1.328660243 | 4.048121358                                | 1.085959402                                  |
| Il16                         | NM_010551        | 4.453805418  | 2.532329693  | 3.640468164                                | 2.831112526                                  |
| Il18                         | NM_008360        | 0.101754553  | -3.030520014 | -0.070822283                               | -30.08448567                                 |
| Il24                         | NM_053095        | 0.307227245  | -2.571951861 | -2.516907557                               | -4.72544163                                  |
| Il6                          | NM_031168        | -5.122407533 | -1.861604808 | -4.260315475                               | -2.405810232                                 |

**Table S2.** List of differentially expressed genes during B cell activation (*Continued*)

| Gene name | Accession number | WT resting   | WT activated | <i>Irf8</i> <sup>-/-</sup> PU.1cKO resting | <i>Irf8</i> <sup>-/-</sup> PU.1cKO activated |
|-----------|------------------|--------------|--------------|--------------------------------------------|----------------------------------------------|
| Ccr6      | NM_009835        | 0.958647576  | -6.030896893 | -3.255526752                               | -4.72544163                                  |
| Ccr7      | NM_007719        | 2.737902181  | -2.329785807 | 0.802924113                                | -0.592867952                                 |
| Ccr9      | NM_009913        | -0.734878465 | -2.859687919 | -2.821111141                               | -0.868057879                                 |
| Cd27      | NM_001033126     | 0.246626999  | -3.706975321 | -0.880916204                               | -4.139671435                                 |
| Cd28      | NM_007642        | -2.94141608  | -0.708916781 | -3.042064153                               | 2.237950318                                  |
| Cd97      | NM_011925        | 4.830758198  | 0.477733974  | 3.517407445                                | 0.848089255                                  |
| Csf1r     | NM_001037859     | -0.471944932 | -5.031231019 | -1.826000505                               | -1.151345459                                 |
| Csf2rb    | NM_007780        | 3.524707713  | 1.606971207  | 1.68531542                                 | 0.884730736                                  |
| Csf3r     | NM_007782        | -1.413157519 | -3.708926451 | -0.743758396                               | -2.271471588                                 |
| ctla-4    | NM_009843        | -3.798925271 | -0.365356508 | -3.509239891                               | 0.074494404                                  |
| Cxcr3     | NM_009910        | -0.210229647 | -4.446588882 | 0.485211161                                | -1.409579297                                 |
| Cxcr4     | NM_009911        | 7.175418465  | 4.229065678  | 5.912270355                                | 5.217295604                                  |
| Tgfb1     | NM_009370        | -3.801409403 | -1.275817346 | -1.337670857                               | -2.138775228                                 |
| Tgfb2     | NM_009371        | 7.521965072  | 5.459155497  | 6.265126373                                | 4.99497142                                   |
| Tnfrsf10b | NM_020275        | -5.11712077  | -0.600288139 | -3.848025714                               | 0.059776106                                  |
| Tnfrsf12a | NM_013749        | 0.020175585  | -4.446588882 | -2.264563194                               | -3.726826716                                 |
| Tnfrsf19  | NM_013869        | 0.15326604   | -2.223701132 | 3.460117177                                | 0.092564522                                  |
| Tnfrsf4   | NM_011659        | -0.423142364 | -2.571370595 | -1.943776178                               | -2.141333604                                 |
| Tnfrsf8   | NM_009401        | -4.538629027 | -0.176914765 | -30.08448567                               | 1.868715623                                  |
| Lifr      | NM_013584        | -5.122407533 | 1.030905435  | -30.08448567                               | -1.823493981                                 |
| Kit       | NM_021099        | -0.887282999 | -4.030532923 | 0.823247323                                | -0.069549722                                 |
| Il10ra    | NM_008348        | 2.983648554  | 0.884195095  | 1.291936324                                | -0.689931374                                 |
| Il10rb    | NM_008349        | 3.228071942  | 0.969021141  | 1.657541857                                | 0.646258313                                  |
| Il11ra1   | NM_010549        | -0.483819304 | -2.860893382 | -0.736561328                               | -1.921301329                                 |
| Il12rb1   | NM_008353        | -0.590804838 | 2.005911832  | -1.671411669                               | 0.535913856                                  |
| Il17ra    | NM_008359        | 3.151869412  | 0.760105123  | 1.202457581                                | 1.021339483                                  |
| Il1r2     | NM_010555        | -3.532158195 | 0.964269227  | -1.943776178                               | 1.008747577                                  |
| Il2ra     | NM_008367        | -2.313992829 | 0.775057852  | 2.284543771                                | 1.396496332                                  |
| Il2rg     | NM_013563        | 7.682820252  | 5.158518055  | 5.870970058                                | 5.227926165                                  |
| Il7r      | NM_008372        | -0.770487498 | -2.709177919 | 4.844085197                                | 1.581068489                                  |
| Dll1      | NM_007865        | -0.628747057 | -3.708926451 | -2.247394311                               | -1.721294231                                 |
| Fgf22     | NM_023304        | -1.220230051 | -6.030191133 | -1.361579062                               | -2.131084171                                 |
| Pdgfa     | NM_008808        | -3.798925271 | 1.207414427  | -30.08448567                               | -0.638848245                                 |
| Itga4     | NM_010576        | 8.487618937  | 5.176095017  | 7.463659785                                | 5.326458703                                  |
| Itgb1     | NM_010578        | -1.032825354 | 1.764147397  | 1.513752424                                | 1.889095819                                  |
| Il6st     | NM_010560        | -4.538629027 | -1.571055217 | -1.5441286                                 | -1.918830647                                 |
| Igf2r     | NM_010515        | -6.11847247  | -0.278535707 | -1.00819623                                | -0.13612195                                  |
| Gpr77     | NM_176912        | 0.260370738  | -3.223480858 | -0.227539425                               | -1.208111913                                 |
| Fzd6      | NM_008056        | -5.122407533 | -0.900979005 | -0.889563409                               | -0.171655301                                 |
| Fzd7      | NM_008057        | -2.413451923 | -0.362968745 | -1.385379428                               | -1.721294231                                 |
| Flt3      | NM_010229        | -0.599065431 | -3.44620119  | -2.035580584                               | -4.139671435                                 |
| Emr1      | NM_010130        | -3.796437698 | -0.744085732 | -3.834775574                               | -4.138155498                                 |
| Gabbr1    | NM_019439        | 2.832177045  | 0.931990926  | 0.269960052                                | 0.219824263                                  |
| Bmpr1a    | NM_009758        | -3.541904055 | -0.905064397 | -30.08448567                               | -1.47858185                                  |
| Btla      | NM_177584        | 4.699348185  | 1.903125893  | 3.177206112                                | 1.370379771                                  |
| Ccr1      | NM_009912        | 1.170954383  | -2.122796107 | -3.242729719                               | -4.141185976                                 |
| Ccr2      | NM_009915        | 0.100706869  | -4.029205995 | 0.369848433                                | 0.730154358                                  |
| Wnt10a    | NM_009518        | -2.948349699 | -0.537328915 | 0.904919733                                | 0.799867169                                  |
| Wnt10b    | NM_011718        | -2.52996853  | -0.298350269 | -1.142845909                               | 1.330402267                                  |

**Table S2.** List of differentially expressed genes during B cell activation (*Continued*)

| Gene name                         | Accession number | WT resting   | WT activated | Irf8 <sup>-/-</sup> -PU.1cKO resting | Irf8 <sup>-/-</sup> -PU.1cKO activated |
|-----------------------------------|------------------|--------------|--------------|--------------------------------------|----------------------------------------|
| Tnfsf11                           | NM_011613        | -4.124727426 | -1.507642863 | 0.262542001                          | -0.473812113                           |
| Tnfsf14                           | NM_019418        | -4.538629027 | 0.397091791  | -2.648069805                         | 0.671843345                            |
| Pros1                             | NM_011173        | -5.122407533 | 0.596087262  | -30.08448567                         | -0.403288748                           |
| Il5ra                             | NM_008370        | 0.534632553  | 1.986366378  | -1.746336516                         | 1.282700044                            |
| Icosl                             | NM_015790        | 7.688967201  | 2.761291979  | 5.495995967                          | 3.321716625                            |
| Bst1                              | NM_009763        | -1.258294245 | -5.031231019 | 1.819218176                          | -1.339615456                           |
| <b>Transcriptional regulators</b> |                  |              |              |                                      |                                        |
| Bcl6                              | NM_009744        | 5.553898313  | 3.228418563  | 2.549263969                          | 2.700817609                            |
| Pax5                              | NM_008782        | 6.085941034  | 4.054124764  | 5.095039628                          | 3.967129908                            |
| Mef2c                             | NM_025282        | 3.170078357  | 2.851629576  | 1.014747275                          | 2.423184534                            |
| Aicda                             | NM_009645        | 0.424313294  | 4.900229111  | 1.02009979                           | 6.30162122                             |
| Irf4                              | NM_013674        | 2.665080518  | 3.309192739  | 3.065980503                          | 3.916905605                            |
| Irf8                              | NM_008320        | -1.653956927 | -4.445912351 | 1.401690996                          | 1.691764804                            |
| Prdm1                             | NM_007548        | 0.249320613  | -1.076920418 | 0.242063646                          | 2.51421476                             |
| Nfil3                             | NM_017373        | 1.215427345  | 7.277184258  | -1.746336516                         | 6.61385256                             |
| Batf                              | NM_016767        | 1.736680678  | 4.227563566  | 0.592295357                          | 3.921115916                            |
| Xbp1                              | NM_013842        | 5.362902922  | 7.550464228  | 3.975475128                          | 7.928213468                            |
| Sox4                              | NM_009238        | 3.298776599  | 0.994961468  | 6.21833439                           | 4.036668009                            |
| Myb                               | NM_010848        | -0.661911003 | 0.895271078  | 4.269701519                          | 2.4445918                              |
| Lef1                              | NM_010703        | -0.705798151 | -1.706554756 | 2.033009305                          | 0.226689638                            |
| Tcf7                              | NM_009331        | -0.796665398 | -0.817221896 | 1.726183352                          | 1.495001707                            |
| Bcl11a                            | NM_016707        | 5.886693746  | 5.090083477  | 3.521758681                          | 4.394233444                            |
| Zbtb7b                            | NM_009565        | 4.480083801  | 2.324342559  | 1.789005511                          | 1.441250397                            |
| Lmo2                              | NM_008505        | 2.617983624  | 2.037770877  | 0.505659429                          | 1.215851788                            |
| Zbtb48                            | NM_133879        | 0.186154396  | -30.08448567 | -2.648069805                         | -4.139671435                           |
| Ets2                              | NM_011809        | 1.572617921  | -2.029430353 | 1.534798087                          | -0.590121081                           |
| Fos                               | NM_010234        | 7.811420229  | -2.859084934 | 6.712035204                          | -2.550476318                           |
| Fosb                              | NM_008036        | 9.474180041  | -2.031033499 | 7.655898467                          | -2.554528674                           |
| Foxo1                             | NM_019739        | 7.187982505  | 5.18328744   | 6.463019978                          | 5.836153283                            |
| Gfi1b                             | NM_008114        | -4.119660039 | -0.990891958 | -1.375598199                         | 0.007113758                            |
| Hes1                              | NM_008235        | 3.504751816  | -0.077774442 | 2.348176726                          | 0.496589594                            |
| Hhex                              | NM_008245        | 4.232012987  | 1.494900069  | 3.57093457                           | 1.841744654                            |
| Maf                               | NM_001025577     | 2.739899252  | -0.86296144  | 2.674751812                          | -0.34884868                            |
| Bach2                             | NM_001109661.1   | 1.09848062   | -0.574700228 | 1.899343608                          | -1.268557163                           |
| Relb                              | NM_009046        | 2.549673006  | 0.03843273   | 1.814941414                          | 0.217379014                            |
| Jun                               | NM_010591        | 8.211433611  | 5.279818261  | 7.853651732                          | 5.411019762                            |
| Junb                              | NM_008416        | 8.460879584  | 4.509828998  | 7.157839431                          | 4.620782612                            |
| Runx1                             | NM_009821        | 3.398674434  | 0.955886937  | 2.477684052                          | 1.092492334                            |
| notch1                            | NM_008714        | -2.040714989 | -1.639406901 | -0.513249863                         | -1.266376878                           |
| Suv39h1                           | NM_011514        | -0.166441028 | 1.835629543  | 0.444968677                          | 1.800063888                            |
| Dnmt3a                            | NM_007872        | -2.663250506 | 0.41388583   | -0.498477477                         | 0.411027823                            |
| Stat5a                            | NM_001164062     | -3.126506181 | -0.29968653  | -1.197453335                         | -0.592867952                           |
| Stat6                             | NM_009284        | 4.460731856  | 2.521703926  | 3.058217094                          | 2.578015534                            |
| Notch2                            | NM_010928        | 8.005821984  | 5.243239854  | 7.233387082                          | 4.193567525                            |
| Jmjd3                             | NM_001017426     | 1.532140368  | -4.444558452 | -2.505014769                         | -4.72544163                            |
| Ezh2                              | NM_007971        | -0.830972816 | 3.204695415  | 2.554405343                          | 3.807426406                            |
| Rel                               | NM_009044        | 1.349068241  | -0.569553446 | -1.676598775                         | -1.726082169                           |
| Ciita                             | NM_007575        | -0.603195742 | 1.647704227  | 0.678087067                          | 0.79393869                             |
| <b>Others</b>                     |                  |              |              |                                      |                                        |
| Slpi                              | NM_011414        | -3.110053284 | 3.119037671  | -2.041105027                         | 1.386302031                            |

**Table S2.** List of differentially expressed genes during B cell activation (*Continued*)

| Gene name | Accession number | WT resting   | WT activated | <i>Irf8</i> <sup>-/-</sup> -PU.1cKO resting | <i>Irf8</i> <sup>-/-</sup> -PU.1cKO activated |
|-----------|------------------|--------------|--------------|---------------------------------------------|-----------------------------------------------|
| Mpo       | NM_010824        | -2.117120552 | -4.446588882 | 5.004929218                                 | 0.809018697                                   |
| Dnnt      | NM_009345        | -30.08448567 | -30.08448567 | 1.503158136                                 | -4.141185976                                  |
| Blnk      | NM_008528        | 4.620807943  | 1.898639387  | 2.478145775                                 | 2.22904732                                    |
| Bcl2l1    | NM_009743        | -1.421961118 | 2.430882365  | 2.512553306                                 | 2.406567823                                   |
| Bcl2a1a   | NM_009742        | 0.346883963  | 2.735513128  | -2.684339465                                | 0.009358924                                   |
| Bcl2a1d   | NM_007536        | 1.938119932  | 4.675836749  | -0.915440756                                | 1.625532308                                   |
| Rag1      | NM_009019        | -0.911483131 | -30.08448567 | 7.590651976                                 | 4.427746899                                   |
| Rag2      | NM_009020        | -3.128845856 | -6.030896893 | 3.889571637                                 | 1.525762216                                   |
| Bcl3      | NM_033601        | 2.440743948  | -0.865785808 | -2.370267327                                | -0.258273337                                  |
| Angptl4   | NM_020581        | -4.124727426 | -1.570568174 | -0.965604351                                | -1.256551282                                  |
| Tyro3     | NM_019392        | -5.122407533 | -0.572126884 | -30.08448567                                | 0.216687261                                   |
| Lrp5      | NM_008513        | -5.122407533 | -1.445520682 | -1.735747513                                | -1.47858185                                   |
| Lrp6      | NM_008514        | 1.262724199  | -0.674998757 | -0.644424536                                | -0.05215615                                   |
| Lrp8      | NM_001080926.1   | -2.305531897 | 2.434673345  | -1.518680801                                | 2.668635244                                   |
| Grk5      | NM_018869        | -0.132093016 | -2.330908922 | -3.016987084                                | -2.261061094                                  |
| Cish      | NM_009895        | -1.246450229 | 6.591340484  | -0.460176388                                | 6.483513038                                   |
| Socs1     | NM_009896        | 1.295193094  | 5.468476969  | 1.03738715                                  | 5.060335006                                   |
| Socs2     | NM_007706        | -1.168683431 | 6.382392528  | 1.940343218                                 | 6.396330407                                   |
| Socs3     | NM_007707        | 4.078596937  | 4.763934938  | 1.94818377                                  | 3.795615542                                   |

Listed are normalized mean ( $\log_2$ ) reads per kilobase per million (RPKM) of selected genes that are either differentially expressed (>2-fold change, 1% false discovery rate) upon B cell activation or between WT and *Irf8*<sup>-/-</sup>-PU.1cKO (*Irf8*<sup>-/-</sup>-*Spi1*<sup>fl/fl</sup> *Cd19*<sup>cre</sup>) B cells. Data are the mean of two independent experiments.

**Table S3.** Primers used for quantitative real-time PCR

| Primers              | Sequence                       |
|----------------------|--------------------------------|
| <i>Pax5</i> forward  | 5'-CCTACCCTATTGTCACAGGCC-3'    |
| <i>Pax5</i> reverse  | 5'-CCTCTGTCTGTCTCAGGGGTT-3'    |
| <i>Mef2c</i> forward | 5'-AGATCTGACATCCGGTGCAG-3'     |
| <i>Mef2c</i> reverse | 5'-TCTTGTTCAGGTTACCAGGTG-3'    |
| <i>Bcl6</i> forward  | 5'-GCCGGACACCAGTTTTAAAG-3'     |
| <i>Bcl6</i> reverse  | 5'-GGAGGCGATTAAGGTGAGAAG-3'    |
| <i>Hmbs</i> forward  | 5'-GACCTGGTTGTTCACTCCCTGAAG-3' |
| <i>Hmbs</i> reverse  | 5'-GACAACAGCATCACAAAGGGTTTC-3' |

**Table S4.** Primers used for quantitative ChIP PCR

| Primers                       | Sequence                         |
|-------------------------------|----------------------------------|
| <i>Pax5</i> forward           | 5'-TGTAAGGGGATCCTGGTTGA-3'       |
| <i>Pax5</i> reverse           | 5'-GGAACCAGAACTGGGAGGA-3'        |
| <i>Mef2c</i> forward          | 5'-CACACTCAGCCTGCTCTACT-3'       |
| <i>Mef2c</i> reverse          | 5'-CGCGAACAATAAAGGTGTA-3'        |
| <i>Igk3'</i> forward          | 5'-TGATCAAGAAGACCCCTTTGAGGAAC-3' |
| <i>Igk3'</i> reverse          | 5'-GGTAGGGAGCAGGTGATGAGGCTT-3'   |
| <i>Bcl6</i> forward           | 5'-ATATTCCGCTTTTCCTCTGCTAA-3'    |
| <i>Bcl6</i> reverse           | 5'-CCAGCCACCCTGAGTTTACA-3'       |
| <i>Prdm1</i> promoter forward | 5'-GCATGAGAGGCAGGGCAACA-3'       |
| <i>Prdm1</i> promoter reverse | 5'-CCTGCTAACTGAATACATTCAAG-3'    |
| <i>Prdm1</i> 3' forward       | 5'-ACCGTTGAAAGACGGTGACT-3'       |
| <i>Prdm1</i> 3' reverse       | 5'-AATGGCCACATCATCTGTG-3'        |
